# Correction: Distinct Mammalian Precursors Are Committed to Generate Neurons with Defined Dendritic Projection Patterns

Wolfgang Kelsch, Colleen P. Mosley, Chia-Wei Lin, Carlos Lois

Correction for:

Kelsch W, Mosley CP, Lin CW, Lois C (2007) Distinct mammalian precursors are committed to generate neurons with defined dendritic projection patterns. *PLoS Biol* 5(11): e300. doi:10.1371/journal.pbio.0050300

## Figure 1. Raw Data

During the preparation of the graphs, the wrong dataset was plotted in the right-hand graph of Figure 3 for the spine distribution of different GC populations. The correct raw data are shown.

### Spine distribution of ADULT-generated GCs from aSVZ

(absolute number of spines)

| cell # | 28 d.p.i. |        |        |        |         | 56 d.p.i. |        |        |        |         |
|--------|-----------|--------|--------|--------|---------|-----------|--------|--------|--------|---------|
|        | 0-20%     | 20-40% | 40-60% | 60-80% | 80-100% | 0-20%     | 20-40% | 40-60% | 60-80% | 80-100% |
| 1      | 0         | 18     | 22     | 5      | 0       | 36        | 49     | 7      | 0      | 0       |
| 2      | 3         | 11     | 28     | 6      | 0       | 17        | 36     | 26     | 11     | 0       |
| 3      | 25        | 34     | 21     | 6      | 0       | 15        | 34     | 46     | 38     | 3       |
| 4      | 20        | 21     | 10     | 0      | 0       | 25        | 33     | 16     | 5      | 0       |
| 5      | 22        | 42     | 26     | 4      | 0       | 15        | 29     | 16     | 1      | 0       |
| 6      | 9         | 31     | 0      | 0      | 0       | 75        | 108    | 0      | 0      | 0       |
| 7      | 6         | 29     | 37     | 21     | 0       | 39        | 87     | 29     | 5      | 0       |
| 8      | 11        | 17     | 1      | 0      | 0       | 11        | 25     | 35     | 22     | 6       |
| 9      | 31        | 48     | 14     | 0      | 0       | 45        | 81     | 20     | 1      | 0       |
| 10     | 9         | 28     | 24     | 0      | 0       | 33        | 31     | 37     | 11     | 0       |

doi:10.1371/journal.pbio.0060091.g001

## Figure 2. Revised Figure 3

The previously published graph found on the far right of Figure 3 (A) and the corrected graph (B) for the spine distribution of different adult-generated GC populations (for 28 and 56 days post infection (d.p.i.) are shown. We regret any confusion this may have caused.

### A: previous Figure 3

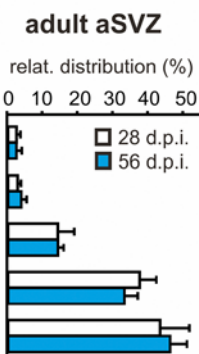

doi:10.1371/journal.pbio.0060091.g002

### B: corrected Figure 3

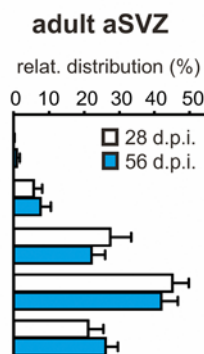

Citation: Kelsch W, Mosley CP, Lin CW, Lois C (2007) Correction: Distinct Mammalian Precursors Are Committed to Generate Neurons with Defined Dendritic Projection Patterns. *PLoS Biol* 5(4): e91. doi:10.1371/journal.pbio.0060091

Received: March 3, 2008; Accepted: March 3, 2008; Published: April 29, 2008.

Copyright: © 2008 Kelsch et al. This is an open-access article distributed under the terms of the Creative Commons Attribution License, which permits unrestricted use, distribution, and reproduction in any medium, provided the original author and source are credited.
